# Supplementary material
Source: publisher site journal article supplement (https://www.dovepress.com/article/412860)
Supplement: Supplementary file 1 [file get_supplementary_file.php]

Supplementary table 1. The standardized mean differences of the matched variables before and after propensity score matching

|  | SMD before PSM | SMD after PSM |
| --- | --- | --- |
| Propensity | 0.77 | 0.05 |
| Sex - Male | -0.10 | 0.01 |
| Sex - Female | 0.10 | -0.01 |
| Age | 0.39 | 0.01 |
| APACHE II | 0.74 | 0.03 |
| Glasgow Coma Scale | -0.16 | -0.06 |

Abbreviations: SMD: Standardized Mean Differences; PSM: Propensity Score Matching; APACHE II: Acute Physiology and Chronic Health Evaluation II.

Supplementary table 2. Cox regression of the patients with acute pancreatitis after propensity score matching

|  | Univariate Cox regression | | | Multivariate Cox regression | | |
| --- | --- | --- | --- | --- | --- | --- |
| B | p | HR (95% CI) | B | p | HR (95% CI) |
| Hemoglobin (g/L) | 0.001 | 0.75 | 1.001(0.995,1.01) |  |  |  |
| WBC (10^9/L) | 0.03 | 0.02 | 1.03(1.01,1.06) | 0.04 | 0.01 | 1.04(1.01,1.06) |
| Neutrophil (10^9/L) | 0.03 | 0.03 | 1.03(1.003,1.07) |  |  |  |
| Lymphocyte (10^9/L) | 0.16 | 0.31 | 1.17(0.86,1.59) |  |  |  |
| Platelet (10^9/L) | -0.003 | 0.01 | 0.997(0.99,0.999) | -0.003 | 0.01 | 0.997(0.99,0.999) |
| TB (umol/L) | 0.002 | 0.30 | 1.002(0.998,1.01) |  |  |  |
| DB (umol/L) | 0.002 | 0.46 | 1.002(0.997,1.01) |  |  |  |
| ALT (IU/L) | 0.00 | 0.76 | 1(1,1) |  |  |  |
| AST (IU/L) | 0.00 | 0.61 | 1(1,1) |  |  |  |
| Creatin (umol/L) | 0.001 | 0.28 | 1.001(0.999,1.002) |  |  |  |
| Albumin (g/L) | -0.03 | 0.11 | 0.97(0.94,1.006) |  |  |  |
| AG > 14.5mmol/L a | 0.68 | 0.01 | 1.93(1.20, 3.10) |  |  |  |
| ACAG>17.14 mmol/L | 0.935 | <0.001 | 2.55(1.55,4.20) | 0.79 | 0.002 | 2.20（1.33,3.65） |

Abbreviations: WBC: White Blood Cell; TB: Total Bilirubin; DB: Direct Bilirubin; ALT: Alanine aminotransferase; AST: Aspartate aminotransferase; AG: Anion Gap; ACAG: Albumin Corrected Anion Gap.

a Anion Gap was divided into two groups based on its median value of 14.5.


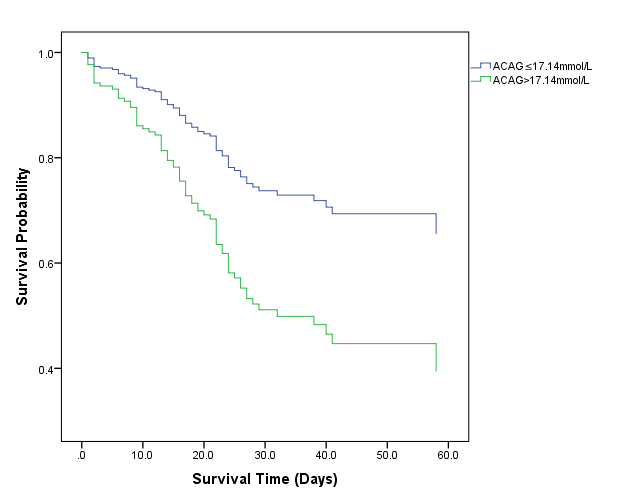


Supplementary figure. Kaplan-Meier survival curves of in-hospital survival in acute pancreatitis patients with two ACAG groups after propensity score matching

Abbreviations: ACAG: Albumin Corrected Anion Gap.
